# Supplementary material for: Tracking W-Formate Dehydrogenase Structural Changes During Catalysis and Enzyme Reoxidation
Source: MDPI journal article supplement (doi:10.3390/ijms24010476), 2022-12-28
Supplement: s1 [file s1]

Table S1- Data Collection and Refinement Statistics

| Crystal                                            | Fdh_1min                                      | Fdh_1min-Staraniso                            | Fdh_1.5min                                    | Fdh_1.5min-Staraniso                          |
|----------------------------------------------------|-----------------------------------------------|-----------------------------------------------|-----------------------------------------------|-----------------------------------------------|
| PDB <sub>code</sub>                                |                                               | 8BQG                                          |                                               | 8BQH                                          |
| <b>Diffraction Data</b>                            |                                               |                                               |                                               |                                               |
| Space group                                        | P2 <sub>1</sub> 2 <sub>1</sub> 2 <sub>1</sub> |
| Cell dimensions (Å)<br>(°)                         | a=64.54, b=122.78,<br>c=148.99                | a=64.54, b=122.78,<br>c=148.99                | a=64.36, b=127.46,<br>c=128.95                | a=64.36, b=127.46,<br>c=128.95                |
| Wavelength (Å)                                     | 0.8856                                        | 0.8856                                        | 0.8856                                        | 0.8856                                        |
| Beamline                                           | ESRF ID23-1                                   | ESRF ID23-1                                   | ESRF ID23-1                                   | ESRF ID23-1                                   |
| No. Crystals                                       | 1                                             | 1                                             | 1                                             | 1                                             |
| Resolution range of<br>data (Å) (last shell)       | 94.75 – 2.19<br>(2.23 – 2.19)                 | 94.75 – 1.95<br>(2.07 – 1.95)                 | 90.65 – 1.90<br>(1.93 – 1.90)                 | 90.65 – 1.61<br>(1.78 – 1.61)                 |
| Completeness (%)<br>(last shell)                   | 97.72 (99.22)                                 | 91.96 (46.32)                                 | 99.35 (100.00)                                | 94.17 (64.00)                                 |
| Rmerge (last shell)                                | 0.090 (0.709)                                 | 0.102 (1.055)                                 | 0.120 (0.803)                                 | 0.130 (0.877)                                 |
| Rmeas (last shell)                                 | 0.102(0.808)                                  | 0.116 (1.212)                                 | 0.132 (0.883)                                 | 0.143 (0.989)                                 |
| I/σ (last shell)                                   | 10.9 (2.1)                                    | 9.2 (1.5)                                     | 10.4 (2.2)                                    | 9.5 (1.7)                                     |
| CC 1/2 (last shell)                                | 0.997 (0.704)                                 | 0.997 (0.435)                                 | 0.996 (0.779)                                 | 0.996 (0.656)                                 |
| Redundancy (last<br>shell)                         | 4.3 (4.2)                                     | 4.3 (4.1)                                     | 5.6 (5.8)                                     | 5.7 (4.7)                                     |
|                                                    |                                               |                                               |                                               |                                               |
| <b>Refinement</b>                                  |                                               |                                               |                                               |                                               |
| Reflections used in<br>refinement (work<br>(free)) |                                               | 69752 (3564)                                  |                                               | 90038 (4778)                                  |
| Rwork                                              |                                               | 0.193                                         |                                               | 0.151                                         |
| Rfree                                              |                                               | 0.243                                         |                                               | 0.175                                         |
| Nº of non-hydrogen<br>atoms                        |                                               | 9509                                          |                                               | 9927                                          |
| Protein                                            |                                               | 9191                                          |                                               | 9134                                          |
| Ligands                                            |                                               | 168                                           |                                               | 229                                           |
| Ions                                               |                                               | 2                                             |                                               | 7                                             |
| Solvent                                            |                                               | 148                                           |                                               | 557                                           |
| <b>Geometry and B-<br/>factors</b>                 |                                               |                                               |                                               |                                               |
| RMSD bond lengths<br>(Å)                           |                                               | 0.010                                         |                                               | 0.012                                         |
| RMSD bond angles<br>(°)                            |                                               | 1.618                                         |                                               | 1.601                                         |
| Average B-factor ALL<br>(Å <sup>2</sup> )          |                                               | 38.30                                         |                                               | 19.36                                         |
| Protein (Å <sup>2</sup> )                          |                                               | 40.86                                         |                                               | 20.06                                         |
| Ligands (Å <sup>2</sup> )                          |                                               | 34.75                                         |                                               | 22.61                                         |
| Ions (Å <sup>2</sup> )                             |                                               | 32.68                                         |                                               | 31.75                                         |
| Solvent (Å <sup>2</sup> )                          |                                               | 34.24                                         |                                               | 25.26                                         |
| Ramachandran<br>favoured (%)                       |                                               | 95.72                                         |                                               | 96.98                                         |
| Ramachandran<br>outliers (%)                       |                                               | 0.26                                          |                                               | 1.04                                          |
| Molprobity score                                   |                                               | 1.87                                          |                                               | 1.31                                          |
| Clashscore                                         |                                               | 4.77                                          |                                               | 3.30                                          |

| Crystal                                            | Fdh_3min                                      | Fdh_5min                                      | Fdh_5min-Staraniso                            |
|----------------------------------------------------|-----------------------------------------------|-----------------------------------------------|-----------------------------------------------|
| PDB <sub>code</sub>                                | 8BQI                                          |                                               | 8BQJ                                          |
| <b>Diffraction Data</b>                            |                                               |                                               |                                               |
| Space group                                        | P2 <sub>1</sub> 2 <sub>1</sub> 2 <sub>1</sub> | P2 <sub>1</sub> 2 <sub>1</sub> 2 <sub>1</sub> | P2 <sub>1</sub> 2 <sub>1</sub> 2 <sub>1</sub> |
| Cell dimensions (Å)<br>(°)                         | a=64.99, b=123.75,<br>c=150.36                | a=64.94, b=123.35,<br>c=150.55                | a=64.94, b=123.35,<br>c=150.55                |
| Wavelength (Å)                                     | 0.8856                                        | 0.8856                                        | 0.8856                                        |
| Beamline                                           | ESRF ID23-1                                   | ESRF ID23-1                                   | ESRF ID23-1                                   |
| No. Crystals                                       | 1                                             | 1                                             | 1                                             |
| Resolution range of<br>data (Å) (last shell)       | 150.36 – 2.36<br>(2.43 – 2.36)                | 95.41 – 2.58<br>(2.62 – 2.58)                 | 95.41 – 2.11<br>(2.36 – 2.11)                 |
| Completeness (%)<br>(last shell)                   | 98.30 (91.50)                                 | 99.08 (99.69)                                 | 92.88 (62.30)                                 |
| Rmerge (last shell)                                | 0.139 (1.258)                                 | 0.110 (0.806)                                 | 0.121 (0.851)                                 |
| Rmeas (last shell)                                 | 0.170 (1.524)                                 | 0.127 (0.927)                                 | 0.139 (0.978)                                 |
| I/σI (last shell)                                  | 9.0 (1.2)                                     | 10.4 (2.2)                                    | 9.1 (1.8)                                     |
| CC 1/2 (last shell)                                | 0.992 (0.409)                                 | 0.994 (0.621)                                 | 0.994 (0.552)                                 |
| Redundancy (last<br>shell)                         | 4.8 (4.8)                                     | 4.3 (4.2)                                     | 4.3 (3.9)                                     |
|                                                    |                                               |                                               |                                               |
| <b>Refinement</b>                                  |                                               |                                               |                                               |
| Reflections used in<br>refinement (work<br>(free)) | 47534 (2409)                                  |                                               | 43543 (2296)                                  |
| Rwork                                              | 0.213                                         |                                               | 0.214                                         |
| Rfree                                              | 0.248                                         |                                               | 0.245                                         |
| Nº of non-hydrogen<br>atoms                        | 9442                                          |                                               | 9431                                          |
| Protein                                            | 9201                                          |                                               | 9191                                          |
| Ligands                                            | 174                                           |                                               | 159                                           |
| Ions                                               | 2                                             |                                               | 2                                             |
| Solvent                                            | 65                                            |                                               | 79                                            |
| <b>Geometry and B-<br/>factors</b>                 |                                               |                                               |                                               |
| RMSD bond lengths<br>(Å)                           | 0.003                                         |                                               | 0.003                                         |
| RMSD bond angles<br>(°)                            | 1.282                                         |                                               | 1.234                                         |
| Average B-factor ALL<br>(Å <sup>2</sup> )          | 44.55                                         |                                               | 38.78                                         |
| Protein (Å <sup>2</sup> )                          | 47.73                                         |                                               | 41.62                                         |
| Ligands (Å <sup>2</sup> )                          | 40.83                                         |                                               | 33.80                                         |
| Ions (Å <sup>2</sup> )                             | 37.43                                         |                                               | 31.59                                         |
| Solvent (Å <sup>2</sup> )                          | 39.63                                         |                                               | 29.84                                         |
| Ramachandran<br>favoured (%)                       | 94.78                                         |                                               | 95.21                                         |
| Ramachandran<br>outliers (%)                       | 0.34                                          |                                               | 0.43                                          |
| Molprobity score                                   | 1.67                                          |                                               | 1.54                                          |
| Clashscore                                         | 2.54                                          |                                               | 3.42                                          |

| Crystal                                            | Fdh_22min                                     | Fdh_22-Staraniso                              | Fdh_FormO2                                    | Fdh_FormO2-Staraniso                          |
|----------------------------------------------------|-----------------------------------------------|-----------------------------------------------|-----------------------------------------------|-----------------------------------------------|
| PDB <sub>code</sub>                                |                                               | 8BQK                                          |                                               | 8BQL                                          |
| <b>Diffraction Data</b>                            |                                               |                                               |                                               |                                               |
| Space group                                        | P2 <sub>1</sub> 2 <sub>1</sub> 2 <sub>1</sub> |
| Cell dimensions (Å)<br>(°)                         | a=64.58, b=123.87,<br>c=149.18                | a=64.58, b=123.87,<br>c=149.18                | a=64.80, b=127.59,<br>c=148.62                | a=64.80, b=127.59,<br>c=148.62                |
| Wavelength (Å)                                     | 0.7749                                        | 0.7749                                        | 0.9686                                        | 0.9686                                        |
| Beamline                                           | ESRF ID23-1                                   | ESRF ID23-1                                   | ESRF ID30B                                    | ESRF ID30B                                    |
| No. Crystals                                       | 1                                             | 1                                             | 1                                             | 1                                             |
| Resolution range of<br>data (Å) (last shell)       | 95.30 – 1.80<br>(1.83 – 1.80)                 | 95.30 – 1.59<br>(1.70 – 1.59)                 | 96.81 – 2.11<br>(2.15 – 2.11)                 | 96.81 – 1.91<br>(2.01 – 1.91)                 |
| Completeness (%)<br>(last shell)                   | 99.13 (99.24)                                 | 92.25 (63.11)                                 | 99.37 (99.89)                                 | 94.46 (61.60)                                 |
| Rmerge (last shell)                                | 0.070 (0.656)                                 | 0.077 (1.125)                                 | 0.168 (1.088)                                 | 0.186 (1.686)                                 |
| Rmeas (last shell)                                 | 0.079 (0.745)                                 | 0.040 (1.234)                                 | 0.177 (1.142)                                 | 0.195 (1.767)                                 |
| I/σI (last shell)                                  | 13.0 (2.2)                                    | 11.3 (1.5)                                    | 10.2 (2.2)                                    | 9.1 (1.3)                                     |
| CC 1/2 (last shell)                                | 0.998 (0.670)                                 | 0.998 (0.579)                                 | 0.997 (0.737)                                 | 0.997 (0.620)                                 |
| Redundancy (last<br>shell)                         | 4.5 (4.5)                                     | 4.7 (5.9)                                     | 10.7 (11.1)                                   | 11.0 (11.1)                                   |
|                                                    |                                               |                                               |                                               |                                               |
| <b>Refinement</b>                                  |                                               |                                               |                                               |                                               |
| Reflections used in<br>refinement (work<br>(free)) |                                               | 123277 (6509)                                 |                                               | 78325 (4045)                                  |
| Rwork                                              |                                               | 0.170                                         |                                               | 0.188                                         |
| Rfree                                              |                                               | 0.192                                         |                                               | 0.225                                         |
| Nº of non-hydrogen<br>atoms                        |                                               | 9875                                          |                                               | 9769                                          |
| Protein                                            |                                               | 9219                                          |                                               | 9228                                          |
| Ligands                                            |                                               | 196                                           |                                               | 166                                           |
| Ions                                               |                                               | 2                                             |                                               | 2                                             |
| Solvent                                            |                                               | 458                                           |                                               | 373                                           |
| <b>Geometry and B-<br/>factors</b>                 |                                               |                                               |                                               |                                               |
| RMSD bond lengths<br>(Å)                           |                                               | 0.007                                         |                                               | 0.004                                         |
| RMSD bond angles<br>(°)                            |                                               | 1.387                                         |                                               | 1.278                                         |
| Average B-factor ALL<br>(Å <sup>2</sup> )          |                                               | 28.48                                         |                                               | 33.79                                         |
| Protein (Å <sup>2</sup> )                          |                                               | 30.01                                         |                                               | 36.02                                         |
| Ligands (Å <sup>2</sup> )                          |                                               | 29.19                                         |                                               | 28.03                                         |
| Ions (Å <sup>2</sup> )                             |                                               | 23.15                                         |                                               | 25.68                                         |
| Solvent (Å <sup>2</sup> )                          |                                               | 33.81                                         |                                               | 31.61                                         |
| Ramachandran<br>favoured (%)                       |                                               | 96.32                                         |                                               | 96.67                                         |
| Ramachandran<br>outliers (%)                       |                                               | 0.26                                          |                                               | 0.34                                          |
| Molprobity score                                   |                                               | 1.35                                          |                                               | 1.18                                          |
| Clashscore                                         |                                               | 3.12                                          |                                               | 2.00                                          |

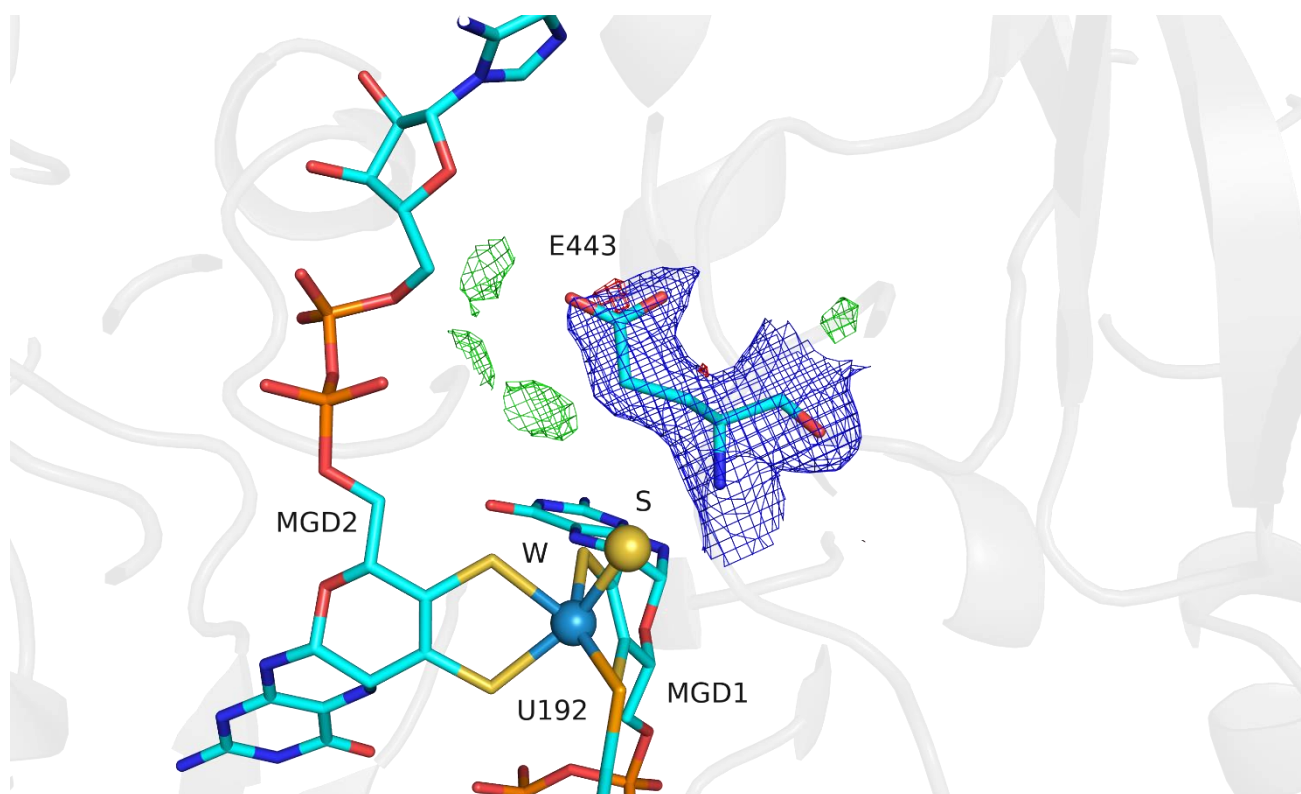

**Figure S1.** *DvFdhAB* formate-soaked Fdh\_5min structure (light blue). U192, E443 and the two MGD co-factors are shown as sticks. The 2fo-fc map is shown as a blue mesh, at 1.0  $\sigma$ , and the fo-fc map is shown as a green and red mesh, respectively, for positive and negative values, at 3.0  $\sigma$ .
